# Supplementary material
Source: Research Square preprint supplement (doi:10.21203/rs.3.rs-10209494/v1)
Supplement: Supplementary file 1 [file 826962f7f1b9875b0340bc70.docx]

**Additional File:**

*Additional file 1: Non-surgical management recommendations from consensus publications*

| **Author** | **Year** | **Title** | **Publication Type** | **Non-surgical management recommendations:** | | | | | |
| --- | --- | --- | --- | --- | --- | --- | --- | --- | --- |
| **Imaging** | **Key objective tests** | **Physiotherapy rehabilitation** | **Immobilisation / bracing** | **Weight-bearing status** | **Return to sport criteria** |
| Blond et al. / Balcarek et al. | 2025 | Management of first-time patellar dislocation: The ESSKA Formal consensus statement parts I & II | Consensus statement | Knee XR + MRI if haemarthrosis present (Grade C – relative agreement) | Rotational alignment, Knee ROM, apprehension, J-sign, patellar passive glide (Grade D – strong agreement) | Recommended – multi-modal   (Grade C - relative agreement) | No indication for bracing  (Grade B - relative agreement) | Not reported | Not reported |
| Parikh et al. | 2024 | Consensus-based guidelines for management of first-time patellar dislocation in adolescents | Consensus statement | Knee XR + CT or MRI only if haemarthrosis present | Not reported | Recommended   (99% agreement) | Knee immobiliser or PSB | WBAT | Time: 2-4 Months post injury  (68% agreement) |
| Watson et al. | 2022 | Lateral Patellar Dislocation: A critical review and Update of evidence based rehabilitation practice guidelines and expected outcomes | Clinical practice guideline | Knee XR + MRI if haemarthrosis present | Not reported | Recommended | PSB (recommended)  ROM brace 0-20deg   (no consensus)  Immobilisation (not recommended) | PWB | Time: >3 months and Criteria: >90% limb symmetry , <4cms on Y balance, psychological readiness |
| Vetrano et al. | 2017 | ISMULT first-time patellar dislocation guidelines | Clinical practice guideline | Knee XR + MRI if any evidence of visible OCD | Apprehension, Basset's sign, gravity subluxation test, passive patellar glide, quads pull test | Recommended | No recommendation provided  (Level D) | Not reported | Criteria: Symmetry of lower limb strength and satisfactory dynamic stability testing |
| Wilk et al. | 1998 | Patellofemoral disorders: A classification system and clinical guidelines for non-operative rehabilitation | Clinical Practice Guideline | Not reported | VMO function, stability testing of cruciate & collateral ligaments, knee ROM, passive patellar glides | Recommended – Multi-modal | Immobilisation then PSB | Not reported | Not reported |
| Hurley et al. / Hurley et al, | 2023 | A modified Delphi consensus statement on patellar instability: Part I & II | Modified Delphi | MRI   (strong consensus) | Evaluation of patellar tracking, crepitus, effusion, passive glides, alignment, Beighton score, j-test, apprehension, knee ROM (strong consensus) | Recommended – multi-modal (unanimous consensus) | No immobilisation   (unanimous consensus)  ROM brace 0-30deg  (no consensus) | WBAT   (strong consensus) | Criteria based with no minimum timeframe (consensus) |

*Additional file 2: Surveys of first-time patellar dislocation management*

| **Author** | **Year** | **Title** | **Publication Type** | **Non-surgical management:** | | | | | |
| --- | --- | --- | --- | --- | --- | --- | --- | --- | --- |
| **Imaging** | **Key objective tests** | **Physiotherapy rehabilitation** | **Immobilisation / bracing** | **Weight-bearing status** | **Return to sport criteria** |
| D'Ambrosi et al. | 2023 | Management of the first episode of traumatic patellar dislocation: an international survey | Survey - Surgeons | XR (57%) and MRI (36%) should be performed for all first time dislocations | Not reported | Not reported | 84% recommended use of knee brace (unspecified type) | During first 15 days: 49% WBAT, PWB 34%, NWB 17%.   After first 15 days: 67% WBAT,   3% NWB/TWB | Not reported |
| Liu et al. | 2018 | Patellar Instability Management - a Survey of the International Patellofemoral study group | Survey - Surgeons | MRI for all first time (66% agreement) | Not reported | Not reported | Not reported | Not reported | Not reported |
| Smith et al. | 2011 | A national survey of the physiotherapy management of patients following first-time patellar dislocation | Survey -Physiotherapists | N/A (Physiotherapy management only) | Observation (patellar position, effusion, gait, alignment), lower limb strength, special tests (Q-angle, Apprehension, J-sign, Patellar glide) | Recommended | Never used in 33% of respondents | Not reported | Not reported |

XR: X-Ray, MRI: Magnetic Resonance Imaging, WBAT: Weightbearing as tolerated, PWB: Partial weightbearing, NWB: Non-weightbearing, TWB: Touch weightbearing.

*Additional file 3: The reported effects of adjusting for confounders in outcomes within included studies*

| **Study** | **Adjusted (multivariable) analysis** | **Anatomical predictors** | **Non-anatomical predictors** | **Outcome** | **Statistical model (effect measure)** | **Outcome** |
| --- | --- | --- | --- | --- | --- | --- |
| Honkonen 2022 | Yes | PA, TD | Nil | Re-dislocation,   Function | Logistic regression, linear regression (OR) | No meaningful change in outcome for different bracing strategies after adjustment for anatomical risk factors |
| Zhang 2019 | Yes | TD, PA, TT-TG, MPFL injury (complete) | Sex, age | Re-dislocation | Binary logistic regression  (OR) | Individual anatomical, demographic and specific MPFL injury patterns are associated with re-dislocation risk |
| Xu 2024 | Yes | TD, TT-TG, MAD, IS Index, PT | Skeletal maturity | Re-dislocation | Multivariate logistic regression  (OR) | Individual and combined anatomical and demographic variables are associated with re-dislocation risk |
| Hevesi 2019 | Yes | TD, TT-TG | Age, open physes | Re-dislocation | Fine & Gray model of multivariable survival regression (SHR) | Individual and combined anatomical and demographic variables influence risk stratification over 10 years post primary injury |
| Kaewkongnok 2018 | Yes | TD, PA | Age, open physes, treatment regimen (bracing, rehabilitation) | Re-dislocation | Logistic regression  (OR) | Treatment regimens were not independently associated with re-dislocation when adjusted for confounding variables. |
| Lewallen 2015 | Yes | PA, TD | Gender, age, open physes, sporting MOI | Re-dislocation | Cox proportional hazards regression, Kaplan Meier (HR) | Individual and combined anatomical, demographic and injury mechanism related variables are associated with re-dislocation risk |
| Tan 2022 | Yes | TT-TG, CA | Age (16.5-18 years) | Re-dislocation | Multivariate logistic regression   (OR) | Age and individual anatomical variables associated with re-dislocation risk |
| Weirer 2022 | Yes | LTI (<12deg) | Age (<16), contralateral instability | Re-dislocation | Stepwise logistic regression  (OR) | Age, contralateral instability and LTI are associated with re-dislocation risk |
| Arendt 2018 | Yes | PA, TD | Open physes | Re-dislocation | Stepwise logistic regression  (OR) | Skeletal maturity and anatomical risk factors both individually and when combined are associated with re-dislocation risk |
| Christensen 2017 | Yes | PA, TD, TT-TG | Age (<18 years), sex | Re-dislocation | Multivariate logistic regression  (OR) | Anatomical risk factors were associated with greater re-dislocation risk than demographic variables (age, sex) |
| Jacquith 2017 | Yes | PA, TD | Age (<14 years), open physes, contralateral dislocation history | Re-dislocation | Multivariate logistic regression  (OR) | Anatomical and demographic risk factors were associated with re-dislocation risk |

Note: Open physes also reported as skeletal immaturity (open growth plates evident on radiographic imaging).
MPFL: Medial patellofemoral ligament. PA: Patella Alta, TD: Trochlear Dysplasia, TT-TG: Tibial tubercle to trochlear groove distance, PT: Patellar tilt, MAD: Mechanical axis deviation, IS Index: Insall-Salvati Index, LTI: Lateral trochlear inclination angle, MOI: Mechanism of injury, CA: Congruence angle. Effect measures: Odds ratio (OR), Subdistribution Hazard Ratio (SHR),Hazard Ratio (HR)

*Additional file 4: Case reports & case series of non-surgical management (Patient characteristics, interventions and outcomes)*

| **Study** | **Age** | **Imaging**  **conducted** | **Pathological variables reported** | **Anatomical risk factors reported** | **Bracing strategy** | **ROM allowance** | **Duration of bracing (weeks)** | **Exercise-based rehabilitation** | **RTS** | **Follow-up period (years)** | **Re-dislocation** | **Functional outcomes** |
| --- | --- | --- | --- | --- | --- | --- | --- | --- | --- | --- | --- | --- |
| Bockover 2025 | 13 | MRI | MPFL Severity + Location | Nil | PSB | Unrestricted | NR | Multi-modal | Criteria | 0.25 | 0% | LEFS |
| Chang 2023 | 20 | XR | Nil | Nil | NR | - | - | Multi-modal | NR | 0.75 | 0% | LEFS |
| Grewal 2016 | 32 | XR + CT | Patellar fracture | Nil | Extension splint | Immobilised | 2 | Quads strengthening | NR | 0.05 | NR | NR |
| Chronister   2015 | 19.5 | XR + MRI | Nil | Nil | Bandage | Immobilised | 0.3 | Generalised strengthening | Criteria | 2 | 0% | NR |
| Enix   2015 | 24 | XR + MRI | MPFL | Nil | Cast, ROM | Immobilised | 3 | Multi-modal | NR | 1 | NR | NR |
| Dawson 2014 | 16 | XR | Nil | PA, Q-Angle | Extension splint | Immobilised | 3 | Multi-modal | Criteria | NR | NR | SEBT, VAS |
| Cho   2009 | 16 | XR + MRI | MPFL, Chondral injury | TD | PSB | Unrestricted | NR | Multi-modal | NR | 0.5 | NR | NR |
| Racouillat 2007 | 16 | MRI | MPFL severity, chondral injury | Nil | Tape | Unrestricted | 8 | Multi-modal | Criteria | 0.2 | N/A | LEFS |

NR: Not reported, MRI: Magnetic resonance imaging, XR: Xray imaging, MPFL: Medial patellofemoral ligament, PSB: Patella stabilising brace, ROM: Range-of-motion brace, LEFS: Lower extremity functional scale, SEBT: Star excursion balance test, VAS: Visual analogue scale, PA: Patella alta, TD: Trochlear dysplasia
